# Supplementary material for: Structural Polymorphism of Guanine Quadruplex-Containing Regions in Human Promoters
Source: MDPI journal article supplement (doi:10.3390/ijms232416020), 2022-12-16
Supplement: s1 [file s1]

**Supplementary Information**

**Structural polymorphism of guanine  
quadruplex-containing regions in human  
promoters**

Christopher Hennecker, Lynn Yamout, Chuyang Zhang, Chenzhi Zhao, David Hiraki, Nicolas Moitessier, and Anthony Mittermaier

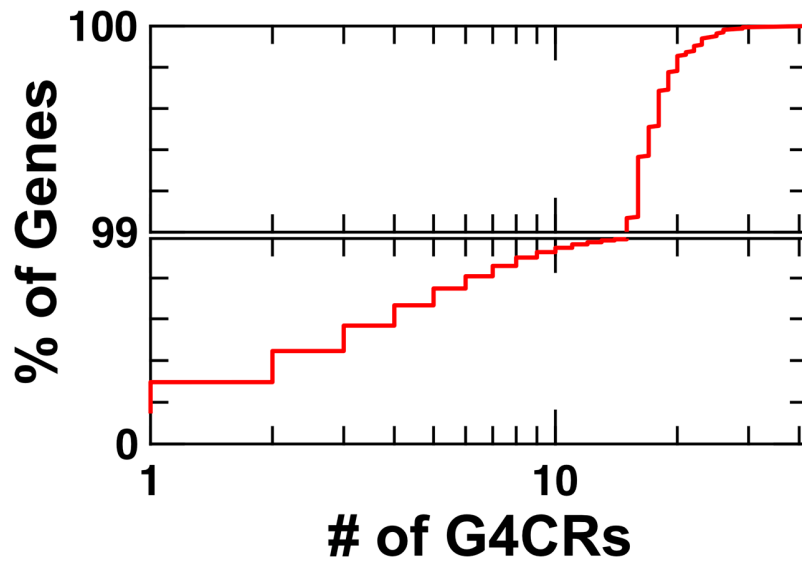

Figure S1: Cumulative plot of the number of G4CRs for human genes considering both coding and non-coding strands. The number of G4CRs is plotted on a logarithmic scale. The bottom panel represents the first 99% of genes whereas the top panel represents the top 1% of genes.

## Figure S2a. Animals

**M. mulatta**

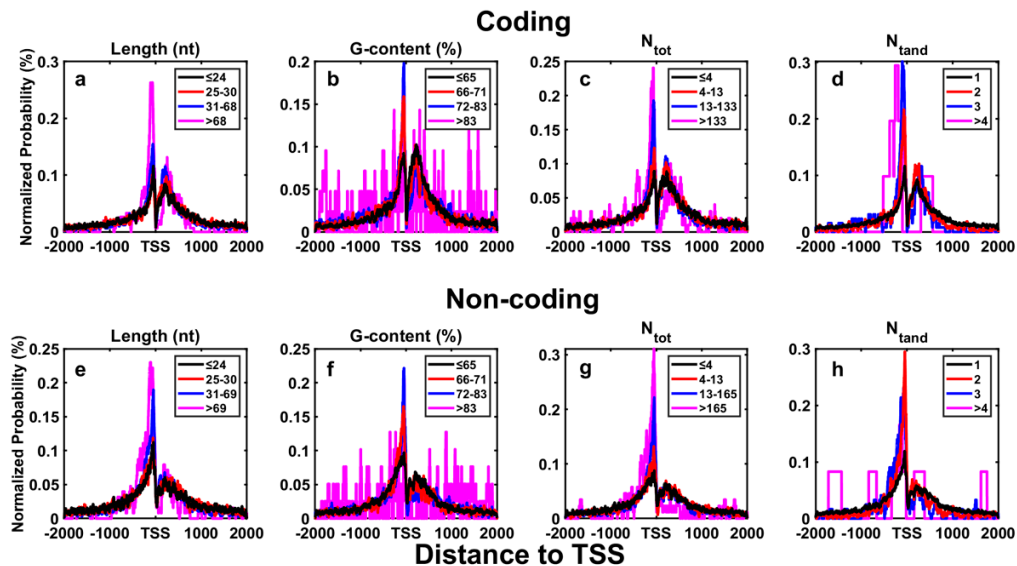

## M. musculus

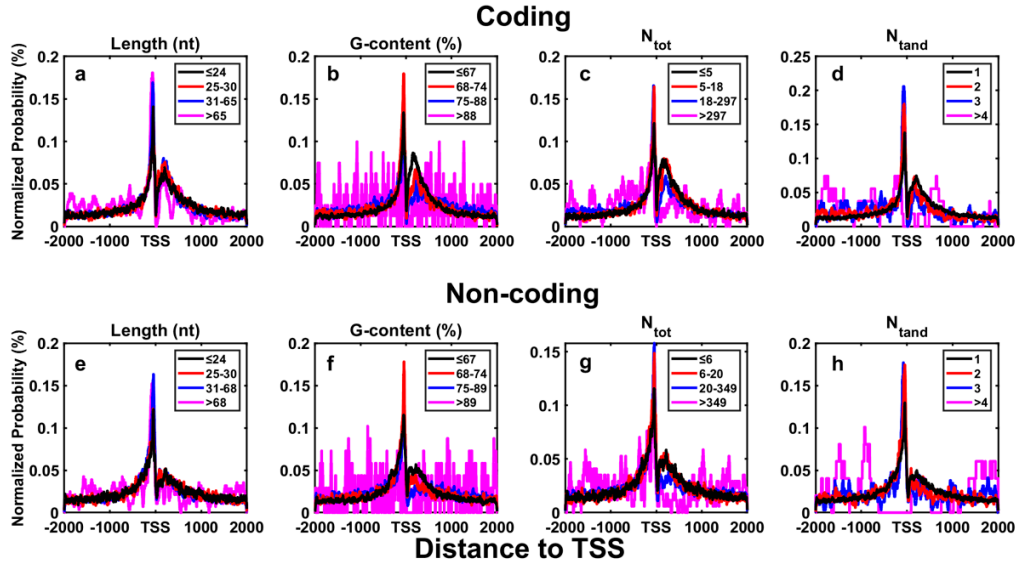

## R. norvegicus

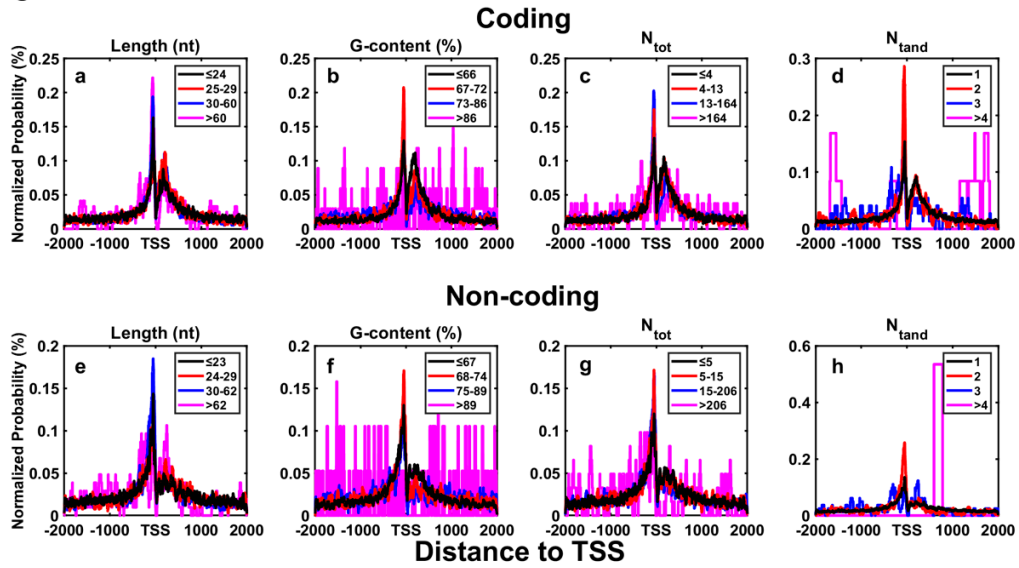

## C. familiaris

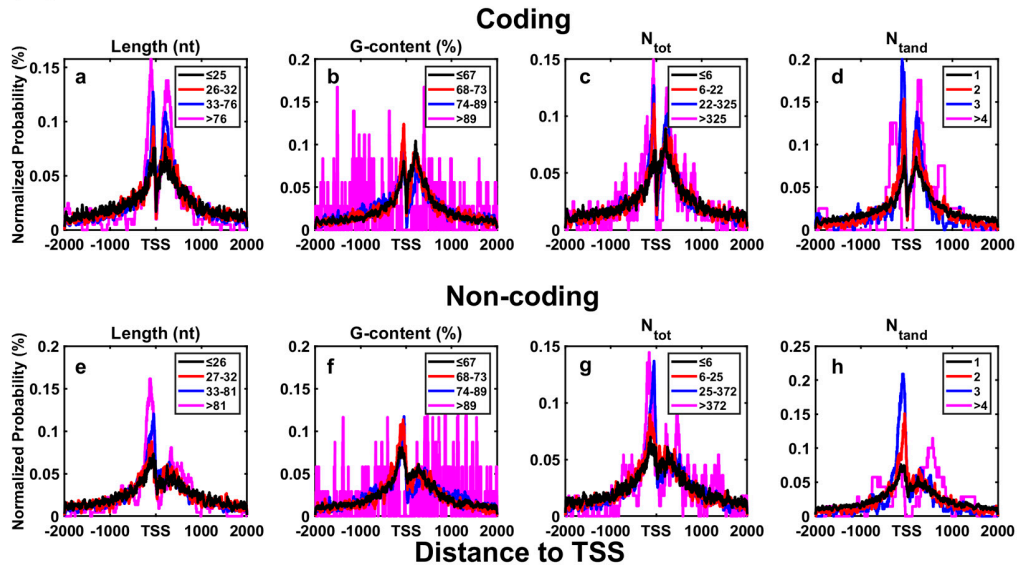

## G. gallus

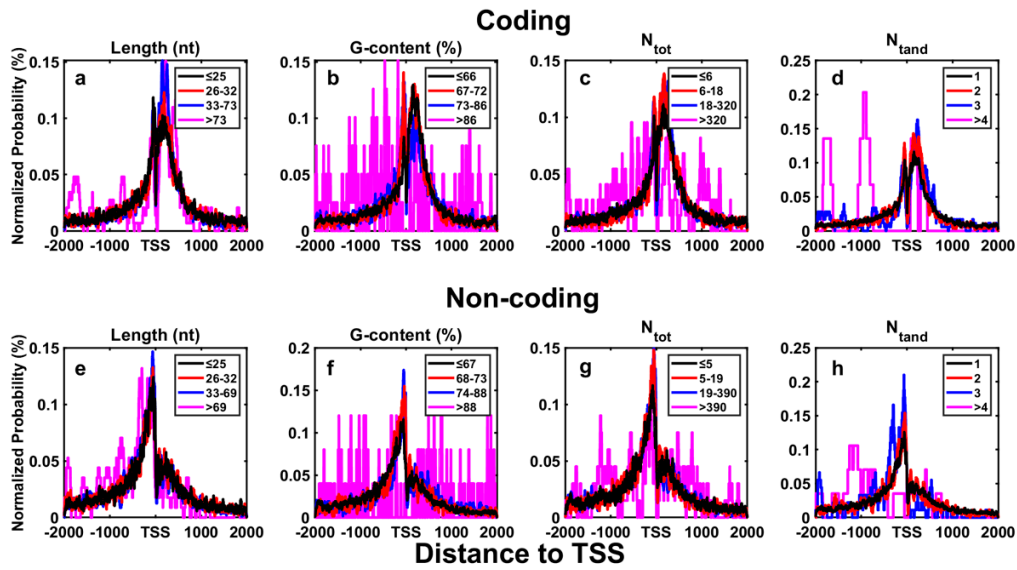

## Figure S2b. Invertebrates

### D. melanogaster

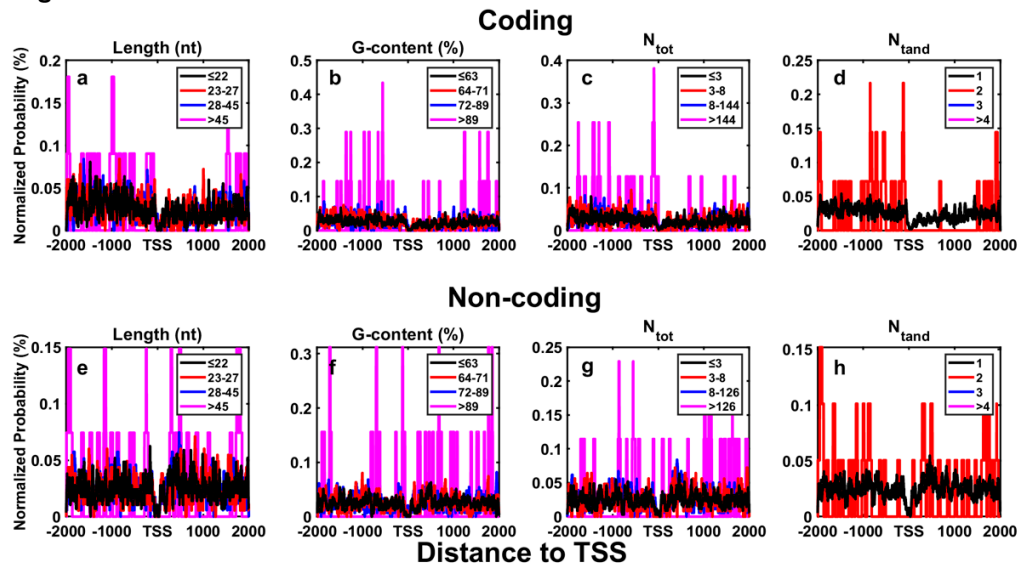

### A. mellifera

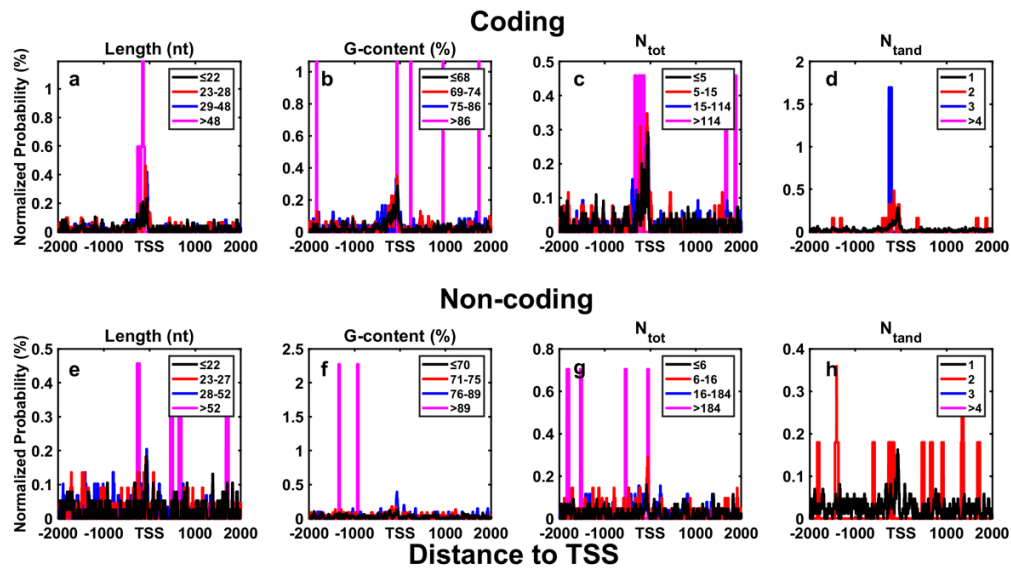

## D. rerio

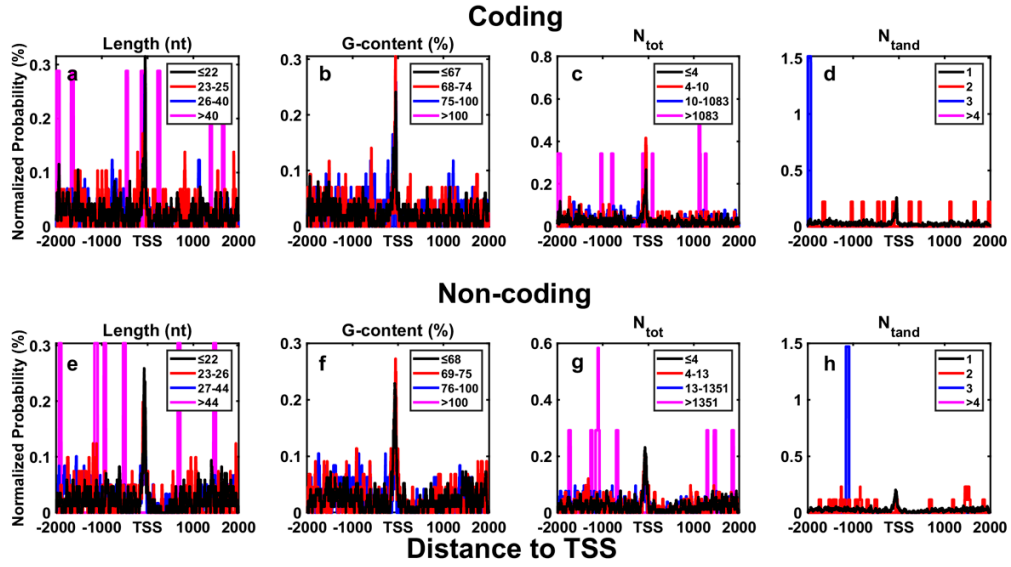

## C. elegans

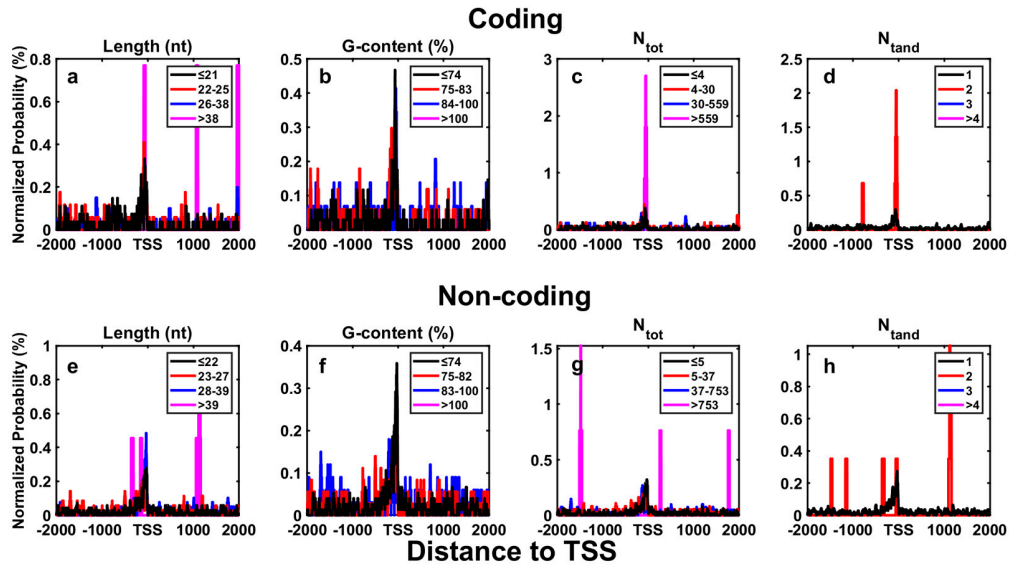

# Figure S2c. Plants

## A. thaliana

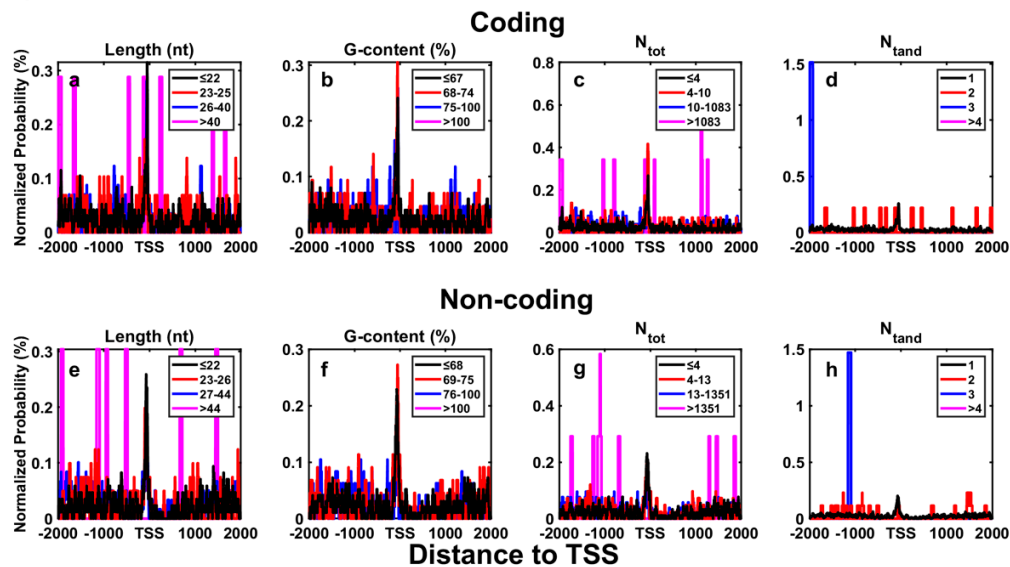

## Z. mays

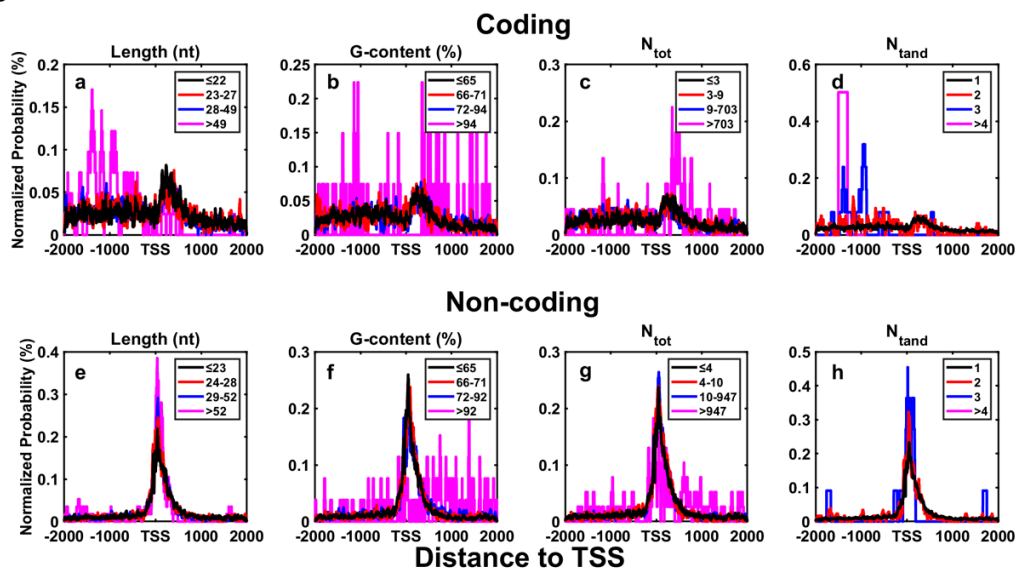

# Figure S2d. Fungi

## S. cerevisiae

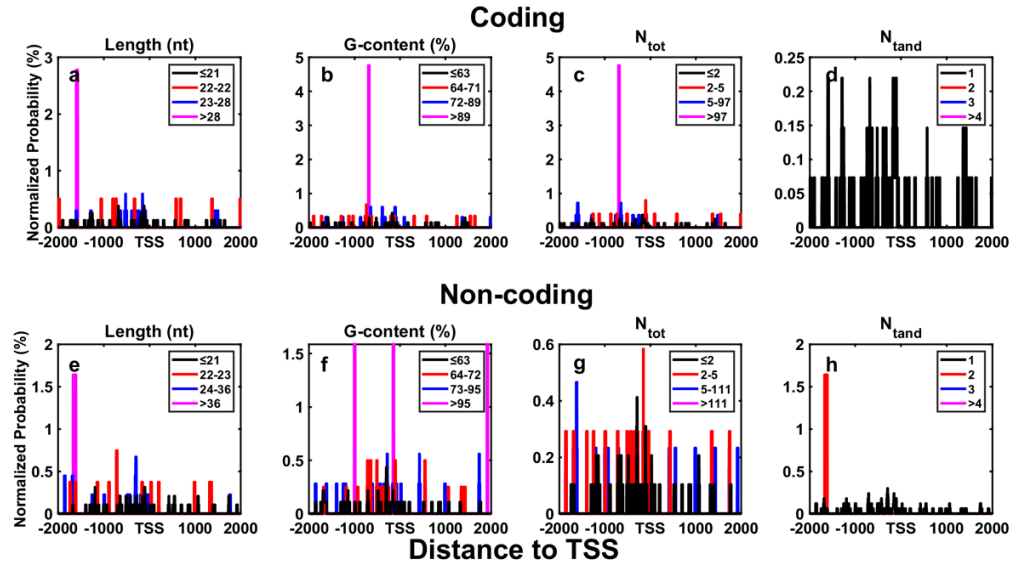

## S. pombe

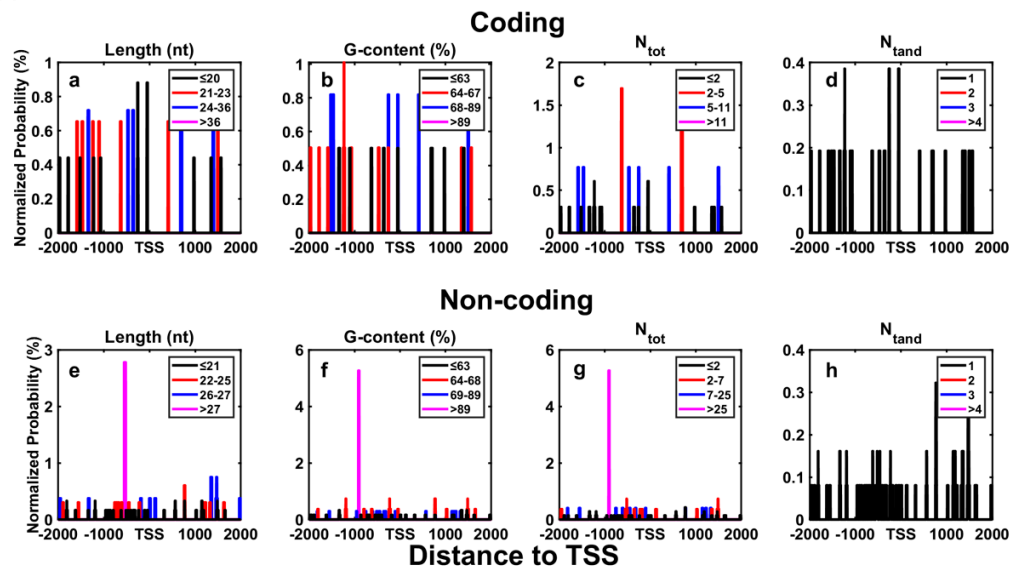



## Figure S2e. Protozoa

*P. falciparum*

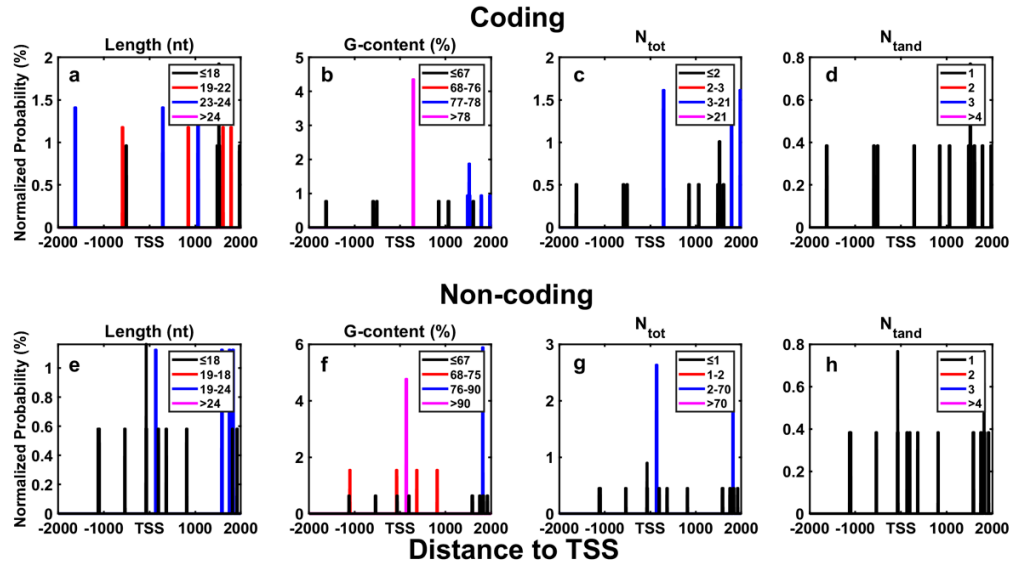

## Figure S2f. Shuffled

Shuffled

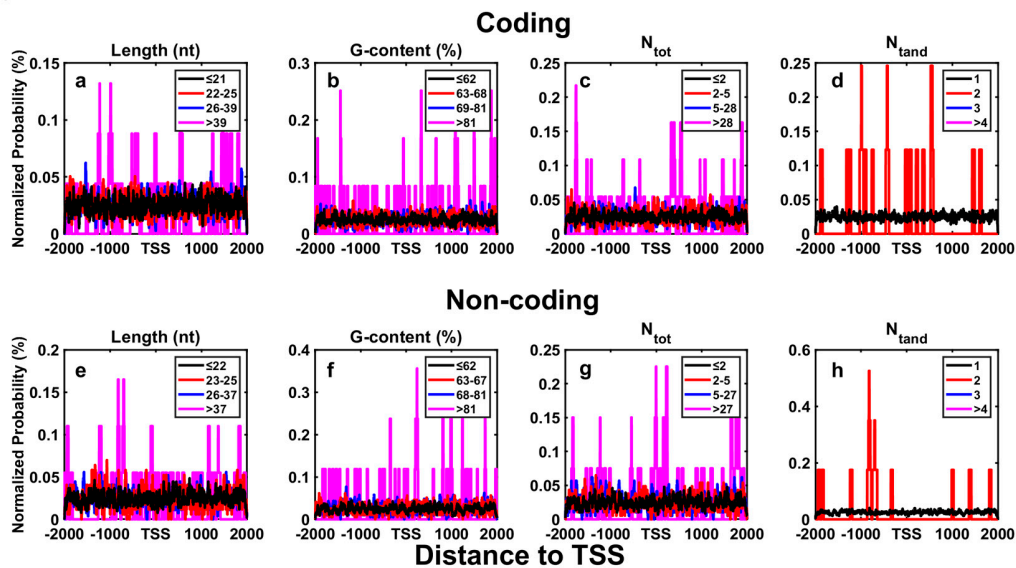

Figure S2: Likelihood that a residue lies within a G4CR possessing certain characteristics, plotted as a function of the residue's position relative to the transcription start site (TSS), for **a)** animals, **b)** invertebrates, **c)** plants, **d)** fungi, **e)** protozoa, **f)** shuffled, promoter sequences. Colours represent the bottom 50% of G4CRs (black), 50-75% of G4CR, 76-99%, and top 1% of G4CRs. Specific values are given in the legend of each panel. Panels a-d are for the coding strand (Length, G-content,  $N_{tot}$ , and  $N_{tand}$  respectively). Panels e-h are for the non-coding strand (Length, G-content,  $N_{tot}$ , and  $N_{tand}$  respectively).

*Table S1: Statistics on analysis of the coding strand of eukaryote promoters. Length, %guanosine, and  $N_{\text{tot}}$  are reported as their median values.*

| Coding Strand   |             |         |            |        |            |                  |
|-----------------|-------------|---------|------------|--------|------------|------------------|
| Species         | # Promoters | # G4CRs | #G4 motifs | Length | %guanosine | $N_{\text{tot}}$ |
| H. sapiens      | 29598       | 61012   | 921566     | 25     | 65         | 4                |
| M. mulatta      | 9575        | 17619   | 241709     | 24     | 65         | 4                |
| M. musculus     | 25111       | 35503   | 857790     | 24     | 67         | 5                |
| R. norvegicus   | 12601       | 15768   | 256013     | 24     | 66         | 4                |
| C. familiaris   | 7545        | 20590   | 572821     | 25     | 67         | 6                |
| G. gallus       | 6127        | 15340   | 375948     | 25     | 66         | 6                |
| D. melanogaster | 16972       | 2339    | 25600      | 22     | 63         | 3                |
| A. mellifera    | 6493        | 464     | 6223       | 22     | 68         | 5                |
| D. rerio        | 10728       | 800     | 37917      | 22     | 67         | 4                |
| C. elegans      | 7120        | 290     | 16698      | 22     | 74         | 4                |
| A. thaliana     | 10728       | 800     | 37917      | 22     | 67         | 4                |
| Z. mays         | 17081       | 6165    | 188183     | 22     | 65         | 3                |
| S. cerevisiae   | 5117        | 63      | 490        | 21     | 63         | 2                |
| S. pombe        | 4802        | 24      | 79         | 21     | 64         | 2                |
| P. falciparum   | 5597        | 13      | 46         | 20     | 76         | 2                |

*Table S2: Statistics on analysis of the non-coding strand of eukaryote promoters. Length, %guanosine, and  $N_{\text{tot}}$  are reported as their median values.*

| Non-coding Strand |             |         |            |        |            |                  |
|-------------------|-------------|---------|------------|--------|------------|------------------|
| Species           | # Promoters | # G4CRs | #G4 motifs | Length | %guanosine | $N_{\text{tot}}$ |
| H. sapiens        | 29598       | 50524   | 833421     | 24     | 65         | 4                |
| M. mulatta        | 9575        | 14818   | 211580     | 24     | 65         | 4                |
| M. musculus       | 25111       | 30783   | 862230     | 24     | 67         | 6                |
| R. norvegicus     | 12601       | 13324   | 238733     | 23     | 67         | 5                |
| C. familiaris     | 7545        | 18475   | 645158     | 26     | 67         | 6                |
| G. gallus         | 6127        | 11463   | 322532     | 25     | 67         | 5                |
| D. melanogaster   | 16972       | 2726    | 26668      | 22     | 63         | 3                |
| A. mellifera      | 6493        | 373     | 6851       | 22     | 70         | 6                |
| D. rerio          | 10728       | 790     | 49703      | 22     | 68         | 4                |
| C. elegans        | 7120        | 616     | 33230      | 22     | 74         | 5                |
| A. thaliana       | 10728       | 790     | 49703      | 22     | 68         | 4                |
| Z. mays           | 17081       | 10195   | 360194     | 23     | 65         | 4                |
| S. cerevisiae     | 5117        | 79      | 584        | 21     | 64         | 2                |
| S. pombe          | 4802        | 56      | 312        | 21     | 63         | 2                |
| P. falciparum     | 5597        | 14      | 84         | 18     | 67         | 1                |

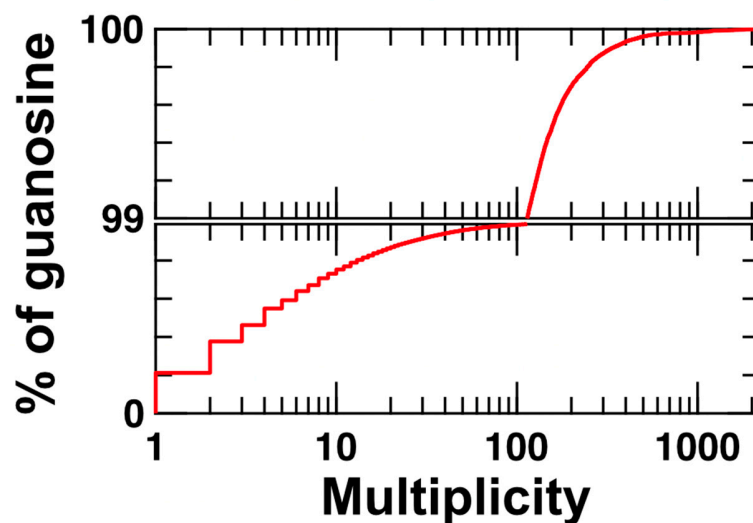

Figure S3: Cumulative plot of multiplicity for guanines participating in at least one G4 structure in a G4CR. Multiplicity is plotted on a logarithmic scale. The bottom panel represents the first 99% of multiplicities whereas the top panel represents the top 1% of multiplicities.

Table S3: Statistics on all the G4CRs found in the human MYC promoter discussed in the main text and Figure 7. G4CRs found on the coding strand are indicated by “c” and G4CRs found on the non-coding strand are indicated by “n”.

| MYC  |             |               |                  |                   |                 |                      |                         |                      |
|------|-------------|---------------|------------------|-------------------|-----------------|----------------------|-------------------------|----------------------|
| G4CR | Length (nt) | G-Content (%) | N <sub>tot</sub> | N <sub>tand</sub> | Distance to TSS | T <sub>m</sub> (min) | T <sub>m</sub> (median) | T <sub>m</sub> (max) |
| 1c   | 27          | 74            | 7                | 1                 | -887            | 50.9                 | 54.5                    | 60.7                 |
| 2c   | 54          | 69            | 21               | 1                 | 1654            | 50.6                 | 53.0                    | 60.7                 |
| 1n   | 25          | 64            | 6                | 1                 | -1034           | 56.3                 | 61.2                    | 64.5                 |
| 2n   | 59          | 64            | 85               | 2                 | -94             | 50.7                 | 60.3                    | 84.1                 |
| 3n   | 31          | 58            | 4                | 1                 | 321             | 50.7                 | 61.4                    | 69.2                 |
| 4n   | 21          | 62            | 1                | 1                 | 1309            | 50.7                 | 50.7                    | 50.7                 |

*Table S4: Statistics on all the G4CRs found in the human VEGFA promoter discussed in the main text and Figure 7. G4CRs found on the coding strand are indicated by “c” and G4CRs found on the non-coding strand are indicated by “n”.*

| VEGFA |             |               |                  |                   |                 |                      |                         |                      |
|-------|-------------|---------------|------------------|-------------------|-----------------|----------------------|-------------------------|----------------------|
| G4CR  | Length (nt) | G-Content (%) | N <sub>tot</sub> | N <sub>tand</sub> | Distance to TSS | T <sub>m</sub> (min) | T <sub>m</sub> (median) | T <sub>m</sub> (max) |
| 1c    | 23          | 74            | 20               | 1                 | -1786           | 50.7                 | 57.4                    | 80.7                 |
| 2c    | 26          | 65            | 2                | 1                 | -1322           | 54.5                 | 56.6                    | 58.7                 |
| 3c    | 30          | 70            | 19               | 1                 | -59             | 52.2                 | 66.8                    | 78.4                 |
| 4c    | 19          | 79            | 4                | 1                 | 634             | 55.0                 | 59.5                    | 64.1                 |
| 5c    | 28          | 71            | 11               | 1                 | 1575            | 50.6                 | 53.0                    | 58.7                 |
| 1n    | 31          | 71            | 9                | 1                 | -1085           | 52.2                 | 55.0                    | 64.1                 |
| 2n    | 19          | 74            | 5                | 1                 | -388            | 55.0                 | 58.4                    | 72.6                 |
| 3n    | 22          | 64            | 2                | 1                 | 1328            | 50.7                 | 59.3                    | 67.9                 |
| 4n    | 22          | 64            | 1                | 1                 | 1675            | 53.7                 | 53.7                    | 53.7                 |
| 5n    | 20          | 70            | 3                | 1                 | 1703            | 51.6                 | 52.6                    | 55.0                 |
| 6n    | 27          | 67            | 6                | 1                 | 1739            | 55.0                 | 74.1                    | 80.7                 |
| 7n    | 19          | 79            | 6                | 1                 | 1866            | 52.6                 | 56.7                    | 60.7                 |

*Table S5: Statistics on all the G4CRs found in the human BCL2 promoter discussed in the main text and Figure 7. G4CRs found on the coding strand are indicated by “c” and G4CRs found on the non-coding strand are indicated by “n”.*

| BCL2 |             |               |                  |                   |                 |                      |                         |                      |
|------|-------------|---------------|------------------|-------------------|-----------------|----------------------|-------------------------|----------------------|
| G4CR | Length (nt) | G-Content (%) | N <sub>tot</sub> | N <sub>tand</sub> | Distance to TSS | T <sub>m</sub> (min) | T <sub>m</sub> (median) | T <sub>m</sub> (max) |
| 1c   | 21          | 67            | 1                | 1                 | -329            | 55.0                 | 55.0                    | 55.0                 |
| 2c   | 33          | 70            | 16               | 1                 | -198            | 50.6                 | 54.6                    | 58.4                 |
| 3c   | 25          | 72            | 12               | 1                 | 1359            | 55.8                 | 60.6                    | 64.9                 |
| 1n   | 21          | 76            | 6                | 1                 | -544            | 50.7                 | 55.3                    | 56.5                 |
| 2n   | 20          | 70            | 3                | 1                 | -292            | 51.6                 | 52.6                    | 55.0                 |
| 3n   | 80          | 69            | 40               | 3                 | -11             | 50.7                 | 57.5                    | 69.9                 |

*Table S6: Statistics on all the G4CRs found in the human KIT promoter discussed in the main text and Figure 7. G4CRs found on the coding strand are indicated by “c” and there are no G4CRs found on the non-coding strand of the KIT promoter.*

| KIT  |             |               |                  |                   |                 |                      |                         |                      |
|------|-------------|---------------|------------------|-------------------|-----------------|----------------------|-------------------------|----------------------|
| G4CR | Length (nt) | G-Content (%) | N <sub>tot</sub> | N <sub>tand</sub> | Distance to TSS | T <sub>m</sub> (min) | T <sub>m</sub> (median) | T <sub>m</sub> (max) |
| 1c   | 33          | 73            | 14               | 1                 | -90             | 50.7                 | 52.6                    | 76.5                 |
| 2c   | 22          | 73            | 6                | 1                 | -51             | 50.7                 | 56.7                    | 66.8                 |
| 3c   | 31          | 65            | 9                | 1                 | 1220            | 52.2                 | 55.6                    | 64.5                 |

*Table S7: Statistics on all the G4CRs found in the human KRAS promoter discussed in the main text and Figure 7. G4CRs found on the coding strand are indicated by “c” and G4CRs found on the non-coding strand are indicated by “n”.*

| KRAS |             |               |                  |                   |                 |                      |                         |                      |
|------|-------------|---------------|------------------|-------------------|-----------------|----------------------|-------------------------|----------------------|
| G4CR | Length (nt) | G-Content (%) | N <sub>tot</sub> | N <sub>tand</sub> | Distance to TSS | T <sub>m</sub> (min) | T <sub>m</sub> (median) | T <sub>m</sub> (max) |
| 1c   | 62          | 69            | 103              | 2                 | 343             | 50.6                 | 56.3                    | 75.0                 |
| 1n   | 52          | 65            | 25               | 2                 | -165            | 50.7                 | 56.3                    | 64.9                 |
| 2n   | 26          | 58            | 2                | 1                 | -120            | 51.9                 | 55.1                    | 58.4                 |
| 3n   | 31          | 71            | 3                | 1                 | 225             | 53.0                 | 63.4                    | 66.8                 |
| 4n   | 41          | 69            | 48               | 1                 | 595             | 50.7                 | 55.8                    | 65.8                 |

## Webserver Description

The webserver has top navigation bar with five buttons: **Input Seq**, **Seq Overview**, **G4 containing region**, **help**, and **contact us** (Figure S4 below).

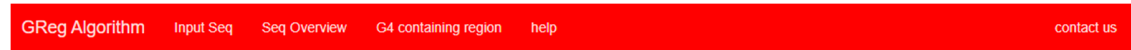

**Figure S4.** The top navigation bar of the webserver.

When a user first accesses the site, they are automatically directed to the **Input Seq** page, which contains a textbox allowing a DNA sequence to be entered by typing or copying and pasting. In addition, the user is required to enter the parameters to be used in the calculation: the maximum loop length, the maximum bulge size, and the minimum estimated melting temperature (°C) for a G4 to be counted among the final ensemble. As well, the user is given the option of calculating G4regions for the complement of the entered sequence and must give the sequence an identifying label (the example in Figure S5 below is taken from Figure 3 in the text).

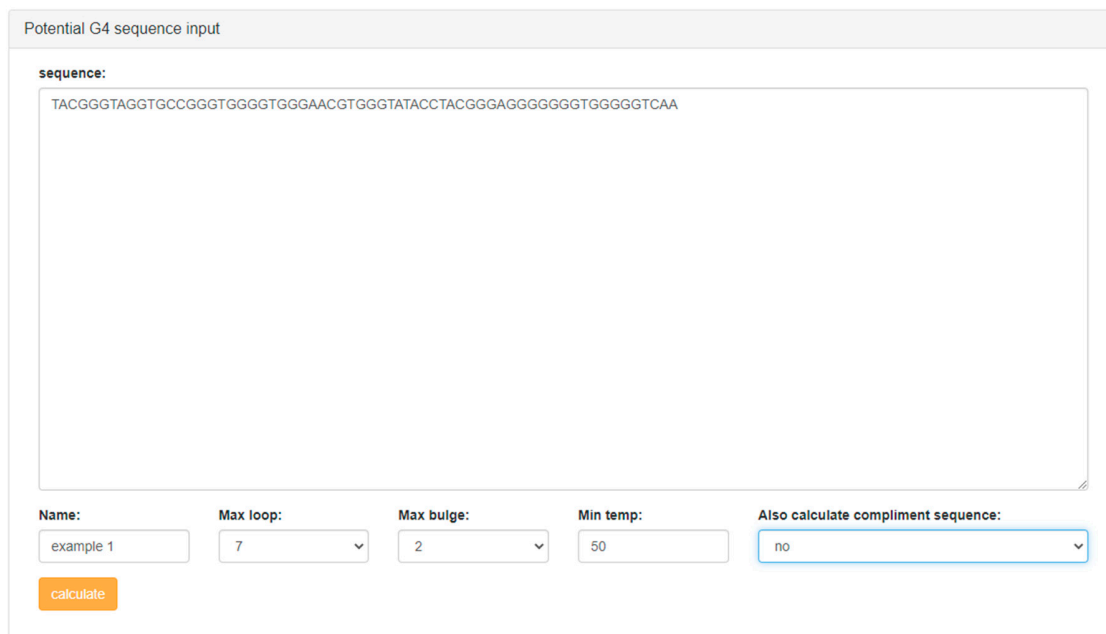

Potential G4 sequence input

sequence:

TACGGGTAGGTGCCGGGTGGGGTGGGAACGTGGGTATACCTACGGGAGGGGGGTGGGGTCAA

Name: example 1

Max loop: 7

Max bulge: 2

Min temp: 50

Also calculate compliment sequence: no

calculate

**Figure S5.** The **Input Seq** page.

Clicking the calculate button at the bottom of the screen initiates the calculate and brings the user to the **Seq Overview** page. The top part of this page contains an interactive Multiplicity Chart that plots folding multiplicity (the number of structural distinct G4s that incorporate a particular G residue into the core) as a function of residue number. Values are plotted in the same order as the sequence entered (i.e. 5' to 3'). Note that if the calculate complement option is set to yes, the values for the complementary strand will be plotted 3' to 5', so that adjacent positions in the DNA duplex will be plotted adjacently in the chart.

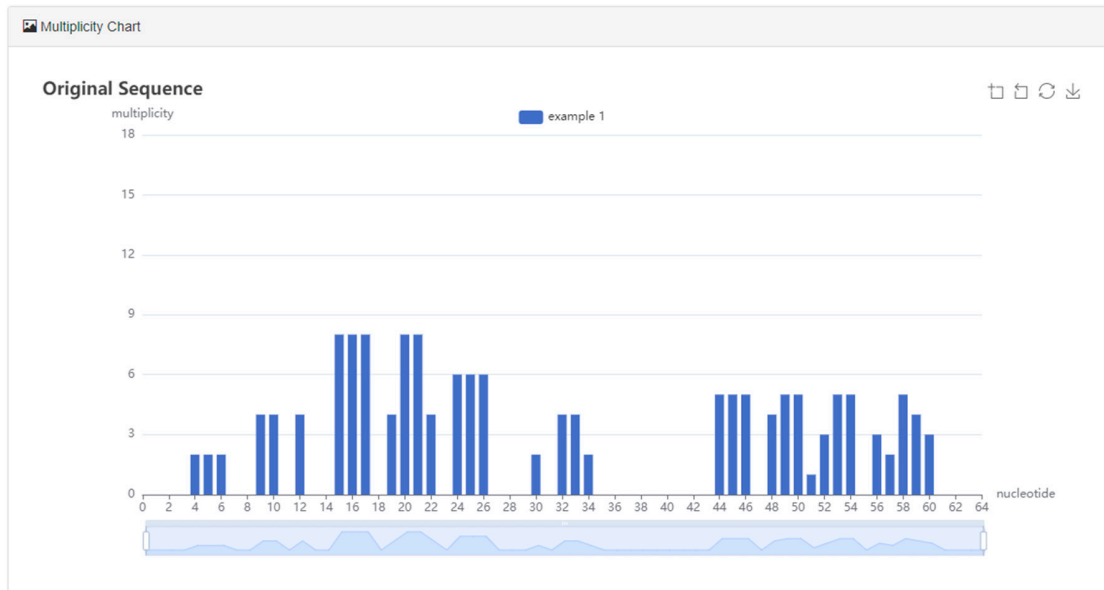

**Figure S6.** The *Seq Overview* page (top)

The bottom of the figure contains a slider that allows the user to zoom in on specific regions of the nucleotide sequence. Additional sequences can be added by clicking the **Input Seq** button in the navigation bar (for example here, the Pu27 sequence from the human *MYC* promoter). All sequences can be plotted simultaneously in the Multiplicity Chart and can be toggled between visible/hidden by clicking the corresponding button at the top of the plot.

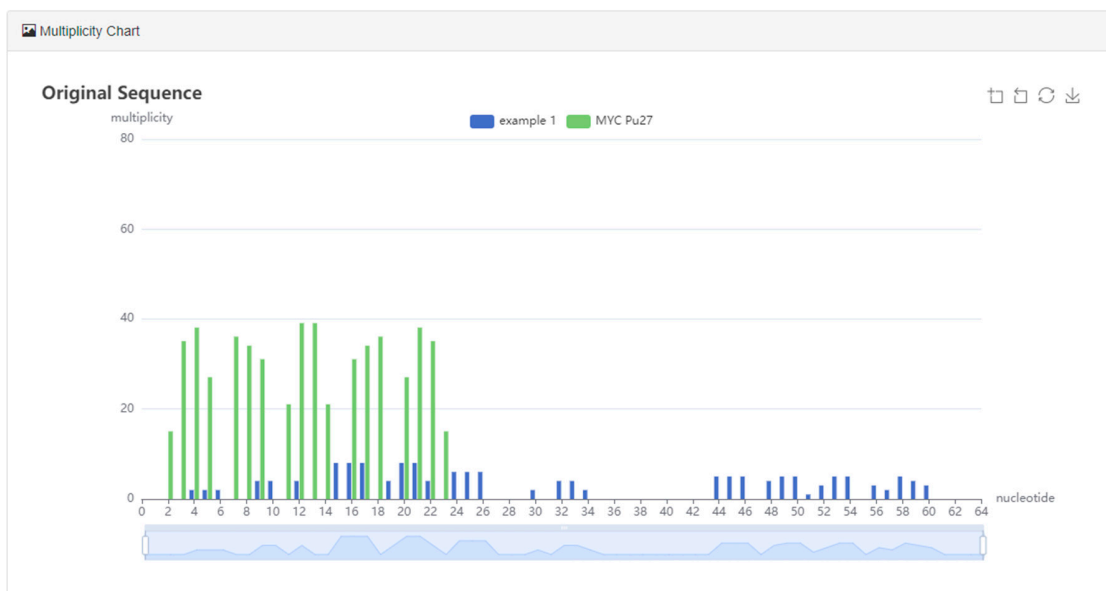

**Figure S7.** The *Seq Overview* page (top), with multiple sequences.

The bottom of the **Seq Overview** page contains the list of sequences entered by the user. The right of each sequence are **details** and **delete** buttons.

| Prediction G-Quadruplex Result Overview |           |                                                                |                |                                                |
|-----------------------------------------|-----------|----------------------------------------------------------------|----------------|------------------------------------------------|
| ID                                      | name      | sequence                                                       | number of G4CR | operation                                      |
| 1                                       | example 1 | TACGGTAGGTGCCGGGTGGGGTGGGAACGTGGGTATACCTACGGGAGGGGGGGTGGGGTCAA | 2              | <a href="#">details</a> <a href="#">delete</a> |
| 2                                       | MYC Pu27  | TGGGGAGGGTGGGGAGGGTGGGGAAGG                                    | 1              | <a href="#">details</a> <a href="#">delete</a> |

**Figure S8.** The **Seq Overview** page (bottom)

The **delete** button deletes the particular sequence. The **details** button lists all G4CRs within the sequence, the multiplicity values of each position with the G4CR, the location of the G4CR within the sequence, the length of the G4CR, the guanine content of the G4CR, the total number of different G4s than can be formed within the G4CR, the total number that can form simultaneously (in tandem), and the minimum, median, and maximum estimated  $T_m$  values of the G4s within each G4CR. Example 1 contains two G4CRs:

| Each G4 containing region |           |                                                         |                                                                                                     |          |        |    |                   |             |                  |                     |                  |                         |
|---------------------------|-----------|---------------------------------------------------------|-----------------------------------------------------------------------------------------------------|----------|--------|----|-------------------|-------------|------------------|---------------------|------------------|-------------------------|
| ID                        | name      | sequence                                                | multiplicity                                                                                        | position | length | %G | # of quadruplexes | # of tandem | $T_m^{est\_min}$ | $T_m^{est\_median}$ | $T_m^{est\_max}$ | operation               |
| 1                         | example 1 | GGGTAGGTGCCGGGTGGGGTGGGAACGTGGG<br>GGGGTGGGAACGTGG<br>G | [2, 2, 2, 0, 0, 4, 4, 0, 4, 0, 4, 0, 0, 8, 8, 8, 0, 4, 8, 8, 4, 0, 6, 6, 6, 0, 0, 0, 2, 0, 4, 4, 2] | 4 to 34  | 31     | 65 | 8                 | 1           | 52.6             | 58.3                | 70.7             | <a href="#">details</a> |
| 2                         | example 1 | GGGAGGGGGGGTGGG<br>GG                                   | [5, 5, 5, 0, 4, 5, 5, 1, 3, 5, 5, 0, 3, 2, 5, 4, 3]                                                 | 44 to 60 | 17     | 88 | 5                 | 1           | 64.1             | 80.7                | 89.9             | <a href="#">details</a> |

**Figure S9.** Sequence **details** output.

The **G4 containing region** button in the navigation bar provides a similar table that includes all of the user's sequences. The **details** button associated with each G4CR gives a list of every G4 formed by a G4CR, with core guanine residues indicated with capital letters, together with the starting and ending position and estimated  $T_m$ . Shown below are the details for the first G4CR of example 1:

| Individual G-Quadruplex |                                |                |              |                 |
|-------------------------|--------------------------------|----------------|--------------|-----------------|
| Number                  | sequence                       | start position | end position | estimated $T_m$ |
| 1                       | GGGtaGGtGccGGGtGGGtggaacgtggg  | 4              | 21           | 58.3            |
| 2                       | gggtaGGtGccGGGtGGGgtGGGaactggg | 9              | 26           | 58.3            |
| 3                       | gggtaGGtGccGGGtgGGtGGGaactggg  | 9              | 26           | 58.3            |
| 4                       | GGGtaGGtGccGGGtgGGtggaactggg   | 4              | 22           | 52.6            |
| 5                       | gggtaggtgccGGtGGGgtGGGaactGGg  | 15             | 33           | 55.0            |
| 6                       | gggtaggtgccGGtgGGtGGGaactGGg   | 15             | 33           | 55.0            |
| 7                       | gggtaggtgccGGtGGGgtGGGaactGGG  | 15             | 34           | 70.7            |
| 8                       | gggtaggtgccGGtgGGtGGGaactGGG   | 15             | 34           | 70.7            |

**Figure S10.** G4CR **details** output.



The **Download Result** button located at the top of the **Seq Overview** page opens a new tab with the entirety of the results listed as text. The example 1 and MYC Pu27 datasets give:

```
>>> example 1 | number of G-quadruplex containing regions: 2
0 0 0 2 2 2 0 0 4 4 0 4 0 0 8 8 8 0 4 8 8 4 0 6 6 6 0 0 0 2 0 4 4 2 0 0 0 0 0 0 0 0 5 5 5 0 4 5 5 1 3 5 5 0 3 2 5 4 3 0 0 0 0
>> example 1_G4CR_1 | position: 4-34 | number of nucleotides: 31 | percentage G content: 65 | total number of quadruplex(es)
could form 8 | number of tandem repeat(s) 1 | maximum estimated melting temperature: 70.7 | median estimated melting
temperature: 58.3 | minimum estimated melting temperature:52.6
GGGTAGGTGCCGGGT GGGGTGGGAACGTGG G
[2, 2, 2, 0, 0, 4, 4, 0, 4, 0, 0, 8, 8, 8, 0, 4, 8, 8, 4, 0, 6, 6, 6, 0, 0, 0, 2, 0, 4, 4, 2]
GGGtaGGtGccGGGtGGGtggggaacgtggg | start position:4 | end position:21 | estimated melting temperature:58.3
gggtaGGtGccGGGtGGGtgGGGaactggg | start position:9 | end position:26 | estimated melting temperature:58.3
gggtaGGtGccGGGtgGGtGGGaactggg | start position:9 | end position:26 | estimated melting temperature:58.3
GGGtaGGtGccGGGtgGGtgggaacgtggg | start position:4 | end position:22 | estimated melting temperature:52.6
gggtaggtgccGGGtGGGtgGGGaactGGg | start position:15 | end position:33 | estimated melting temperature:55.0
gggtaggtgccGGGtgGGtGGGaactGGg | start position:15 | end position:33 | estimated melting temperature:55.0
gggtaggtgccGGGtGGGtgGGGaactGGG | start position:15 | end position:34 | estimated melting temperature:70.7
gggtaggtgccGGGtgGGtGGGaactGGG | start position:15 | end position:34 | estimated melting temperature:70.7

>> example 1_G4CR_2 | position: 44-60 | number of nucleotides: 17 | percentage G content: 88 | total number of quadruplex(es)
could form 5 | number of tandem repeat(s) 1 | maximum estimated melting temperature: 89.9 | median estimated melting
temperature: 80.7 | minimum estimated melting temperature:64.1
GGGAGGGGGGGTGGG GG
[5, 5, 5, 0, 4, 5, 5, 1, 3, 5, 5, 0, 3, 2, 5, 4, 3]
GGGaGGGgGGGtGGGgg | start position:44 | end position:58 | estimated melting temperature:89.9
GGGaGGGgGGGtgGGGg | start position:44 | end position:59 | estimated melting temperature:84.1
GGGaGGGgGGGtgGGG | start position:44 | end position:60 | estimated melting temperature:80.7
GGGaGGGggGGtGgGGG | start position:44 | end position:60 | estimated melting temperature:64.1
GGGagGGGgGGtGgGGG | start position:44 | end position:60 | estimated melting temperature:64.1

continued below
```

```

>>> MYC Pu27 | number of G-quadruplex containing regions: 1
0 15 35 38 27 0 36 34 31 0 21 39 39 21 0 31 34 36 0 27 38 35 15 0 0 0 0
>> MYC Pu27_G4CR_1 | position: 2-23 | number of nucleotides: 22 | percentage G content: 82 | total number of
quadruplex(es) could form 46 | number of tandem repeat(s) 1 | maximum estimated melting temperature: 84.1 | median
estimated melting temperature: 66.4 | minimum estimated melting temperature: 51.6
GGGGAGGGTGGGGAG GGTGGGG
[15, 35, 38, 27, 0, 36, 34, 31, 0, 21, 39, 39, 21, 0, 31, 34, 36, 0, 27, 38, 35, 15]
gGGGaGGGtGGGgaGGGtgggg | start position:3 | end position:18 | estimated melting temperature:84.1
gGGGaGGGtgGGGaGGGtgggg | start position:3 | end position:18 | estimated melting temperature:84.1
ggggaGGGtGGGgaGGGtGGGg | start position:7 | end position:22 | estimated melting temperature:84.1
ggggaGGGtGGGgaGGGtGGGg | start position:7 | end position:22 | estimated melting temperature:84.1
GGGgaGGGtGGGgaGGGtgggg | start position:2 | end position:18 | estimated melting temperature:78.3
GGGgaGGGtGGGgaGGGtgggg | start position:2 | end position:18 | estimated melting temperature:78.3
ggggaGGGtGGGgaGGGtgGGG | start position:7 | end position:23 | estimated melting temperature:78.3
ggggaGGGtGGGgaGGGtgGGG | start position:7 | end position:23 | estimated melting temperature:78.3
gGGGaGGGtGGGgagGGtGggg | start position:3 | end position:20 | estimated melting temperature:60.7
gGGGaGGGtgGGGagGGtGggg | start position:3 | end position:20 | estimated melting temperature:58.3
gggGaGGgtGGGgaGGGtGGGg | start position:5 | end position:22 | estimated melting temperature:60.7
gggGaGGgtGGGgaGGGtGGGg | start position:5 | end position:22 | estimated melting temperature:58.3
GGGgaGGGtGGGgagGGtGggg | start position:2 | end position:20 | estimated melting temperature:55.0
GGGgaGGGtGGGgagGGtGggg | start position:2 | end position:20 | estimated melting temperature:52.6
gGGGaGGGtGGGgaggGtGGgg | start position:3 | end position:21 | estimated melting temperature:58.3
gGGGaGGGtgGGGaggGtGGgg | start position:3 | end position:21 | estimated melting temperature:55.0
ggGgaGGgtGGGgaGGGtGGGg | start position:4 | end position:22 | estimated melting temperature:58.3
ggGgaGGgtGGGgaGGGtGGGg | start position:4 | end position:22 | estimated melting temperature:55.0
gggGaGGgtGGGgaGGGtgGGG | start position:5 | end position:23 | estimated melting temperature:55.0
gggGaGGgtGGGgaGGGtgGGG | start position:5 | end position:23 | estimated melting temperature:52.6
GGGgaGGGtGGGgaggGtGGgg | start position:2 | end position:21 | estimated melting temperature:52.6
gGGGaGGGtGGGgagggtGGGg | start position:3 | end position:22 | estimated melting temperature:75.0
gGGGaGGGtgGGgaGGGtGGGg | start position:3 | end position:22 | estimated melting temperature:75.0
gGGGagggtGGGgaGGGtGGGg | start position:3 | end position:22 | estimated melting temperature:75.0
gGGGaGGGtgGGGagggtGGGg | start position:3 | end position:22 | estimated melting temperature:70.7
gGGGagggtGGGgaGGGtGGGg | start position:3 | end position:22 | estimated melting temperature:70.7
gGGGaGGGtgggGaGGGtGGGg | start position:3 | end position:22 | estimated melting temperature:52.6
gGGGagGtGgggaGGGtGGGg | start position:3 | end position:22 | estimated melting temperature:52.6
gGGGaGGGtgGGGaGGGtGGGg | start position:3 | end position:22 | estimated melting temperature:51.6
gGGGaggGtGGGgaGGGtGGGg | start position:3 | end position:22 | estimated melting temperature:51.6
ggGgaGGgtGGGgaGGGtgGGG | start position:4 | end position:23 | estimated melting temperature:52.6
GGGgagggtGGGgaGGGtGGGg | start position:2 | end position:22 | estimated melting temperature:73.7
GGGgaGGGtGGGgagggtGGGg | start position:2 | end position:22 | estimated melting temperature:69.2
GGGgaGGGtggggaGGGtGGGg | start position:2 | end position:22 | estimated melting temperature:69.2
GGGgagggtGGGgaGGGtGGGg | start position:2 | end position:22 | estimated melting temperature:69.2
GGGgaGGGtgGGGagggtGGGg | start position:3 | end position:23 | estimated melting temperature:64.9
gGGGaGGGtGGGgagggtGGGg | start position:3 | end position:23 | estimated melting temperature:73.7
gGGGaGGGtgGGGagggtGGGg | start position:3 | end position:23 | estimated melting temperature:69.2
gGGGaGGGtggggaGGGtGGGg | start position:3 | end position:23 | estimated melting temperature:69.2
gGGGagggtGGGgaGGGtgGGG | start position:3 | end position:23 | estimated melting temperature:69.2
gGGGagggtGGGgaGGGtgGGG | start position:3 | end position:23 | estimated melting temperature:64.9
GGGgaGGGtGGGgagggtGGGg | start position:2 | end position:23 | estimated melting temperature:67.9
GGGgagggtGGGgaGGGtgGGG | start position:2 | end position:23 | estimated melting temperature:67.9
GGGgaGGGtgGGGagggtGGGg | start position:2 | end position:23 | estimated melting temperature:63.4
GGGgaGGGtggggaGGGtGGGg | start position:2 | end position:23 | estimated melting temperature:63.4
GGGgagggtGGGgaGGGtgGGG | start position:2 | end position:23 | estimated melting temperature:63.4

```

**Figure S11.** Download Result output.

The **Delete Data** button on the **Seq Overview** page deletes all sequences. The **help** button on the navigation bar reproduces this description of the webserver. The **contact us** button has the email address of the corresponding author and a link to the lab webpage. For security reasons, each of the users has a session of 14 days to access their input and calculated data once they first visit our server. The data is kept in our database for 14 days until the session expired, and all the information are automatically and permanently deleted.
